# Supplementary material for: The temporal build-up of hummingbird/plant mutualisms in North America and temperate South America
Source: PubMed Central journal article supplement (PMC4460853; doi:10.1186/s12862-015-0388-z), 2015-06-10

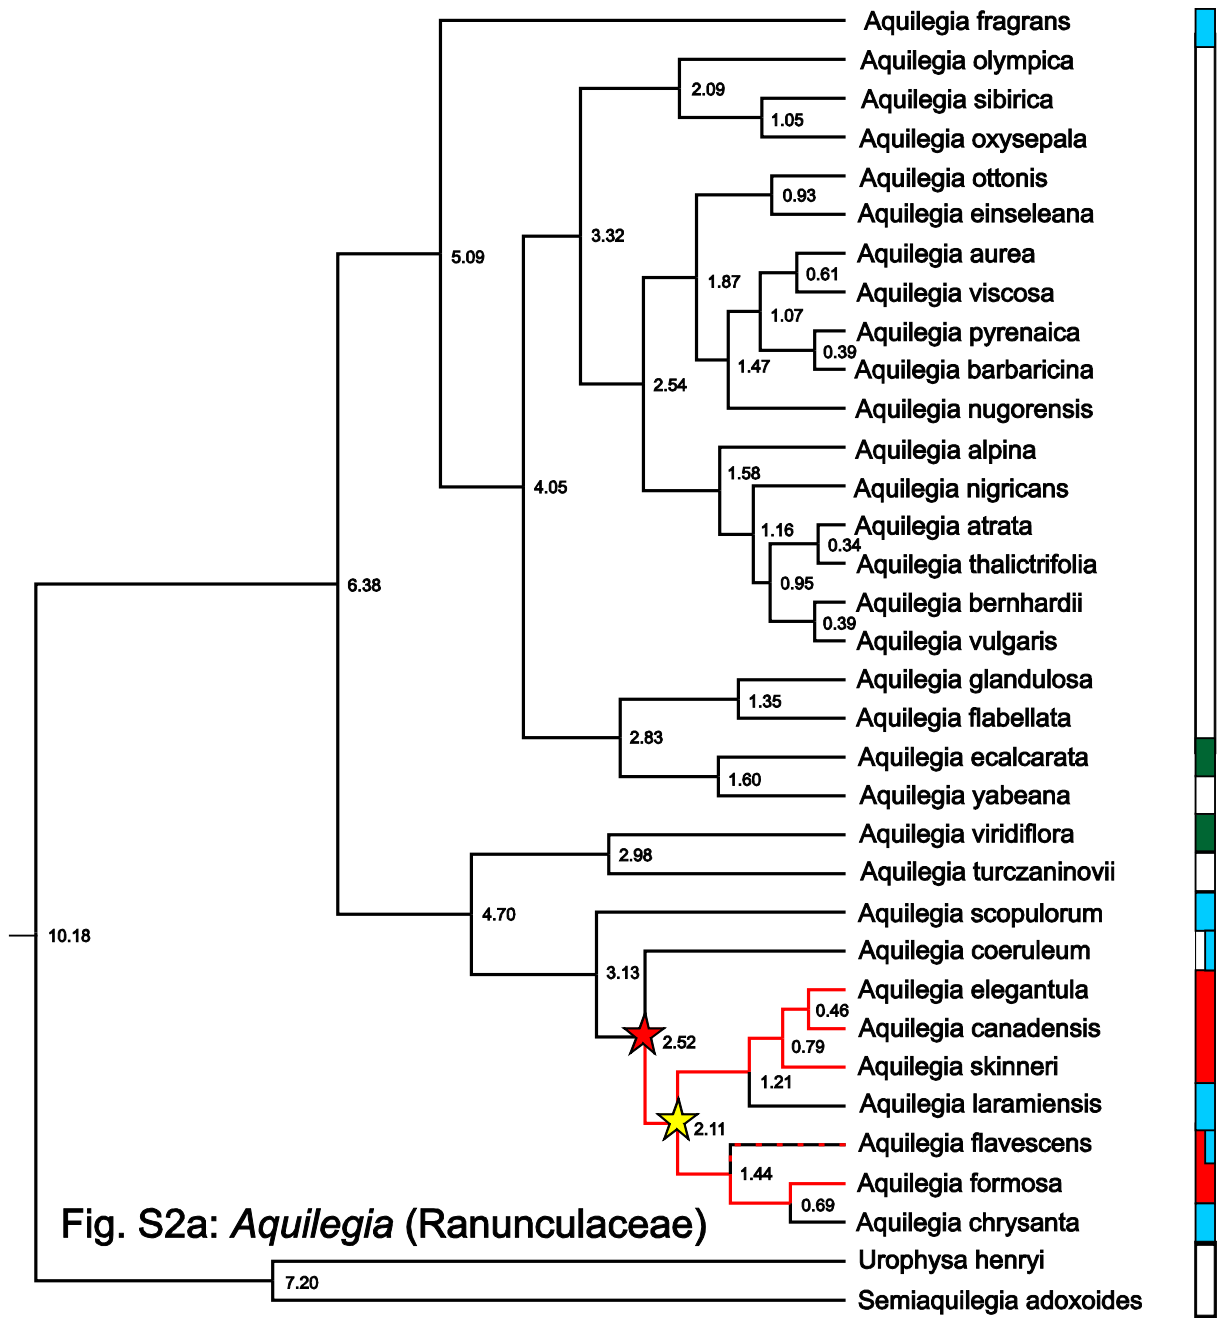

Fig. S2a: *Aquilegia* (Ranunculaceae)

Fig. S2b: *Castilleja* (Orobanchaceae)

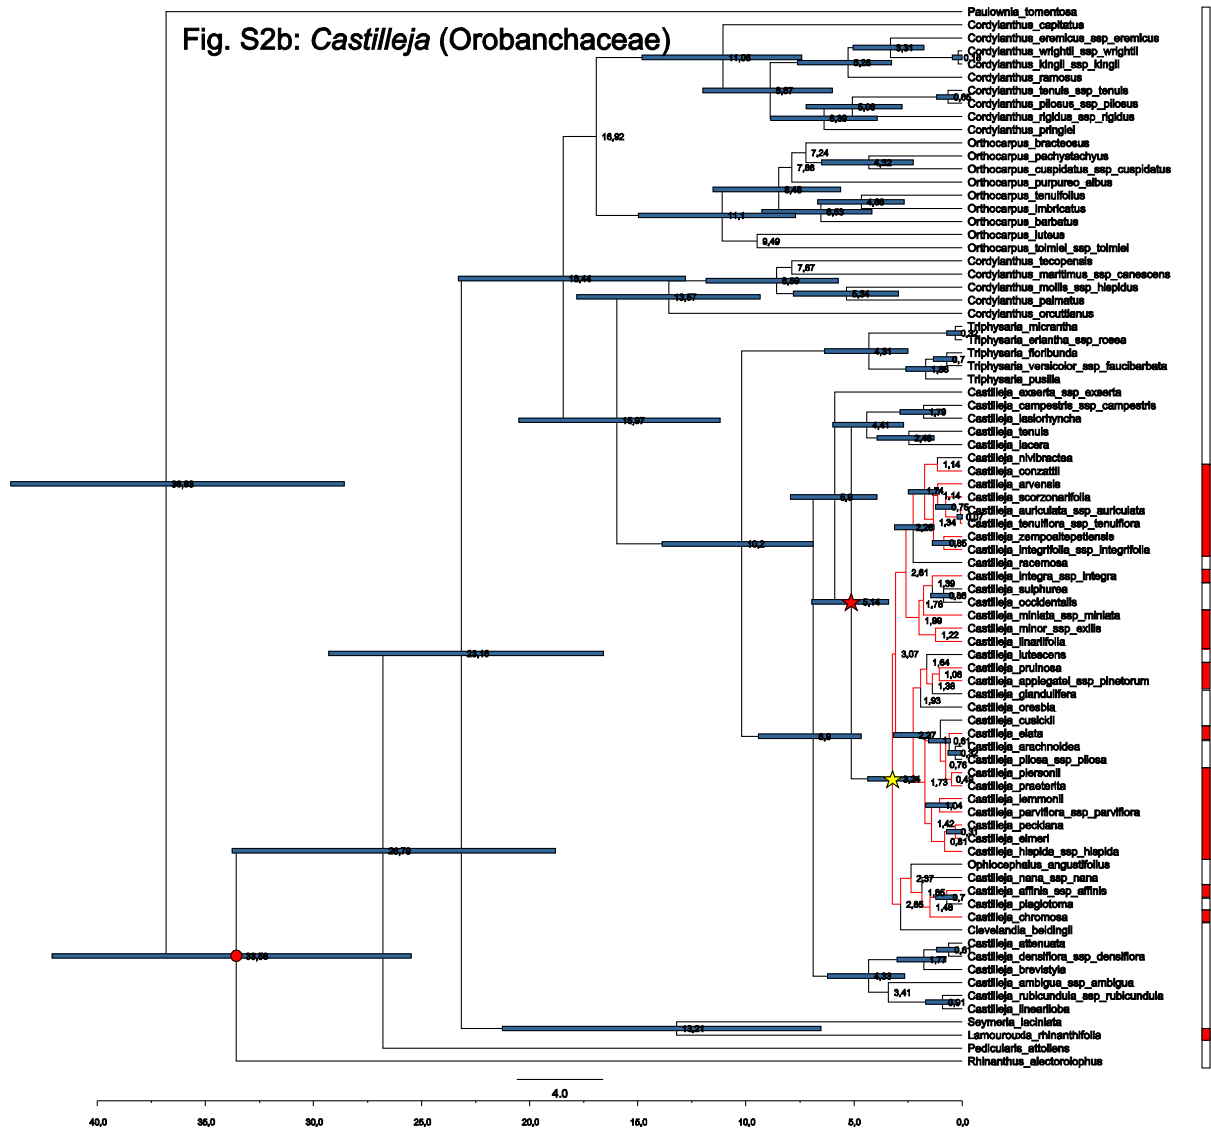

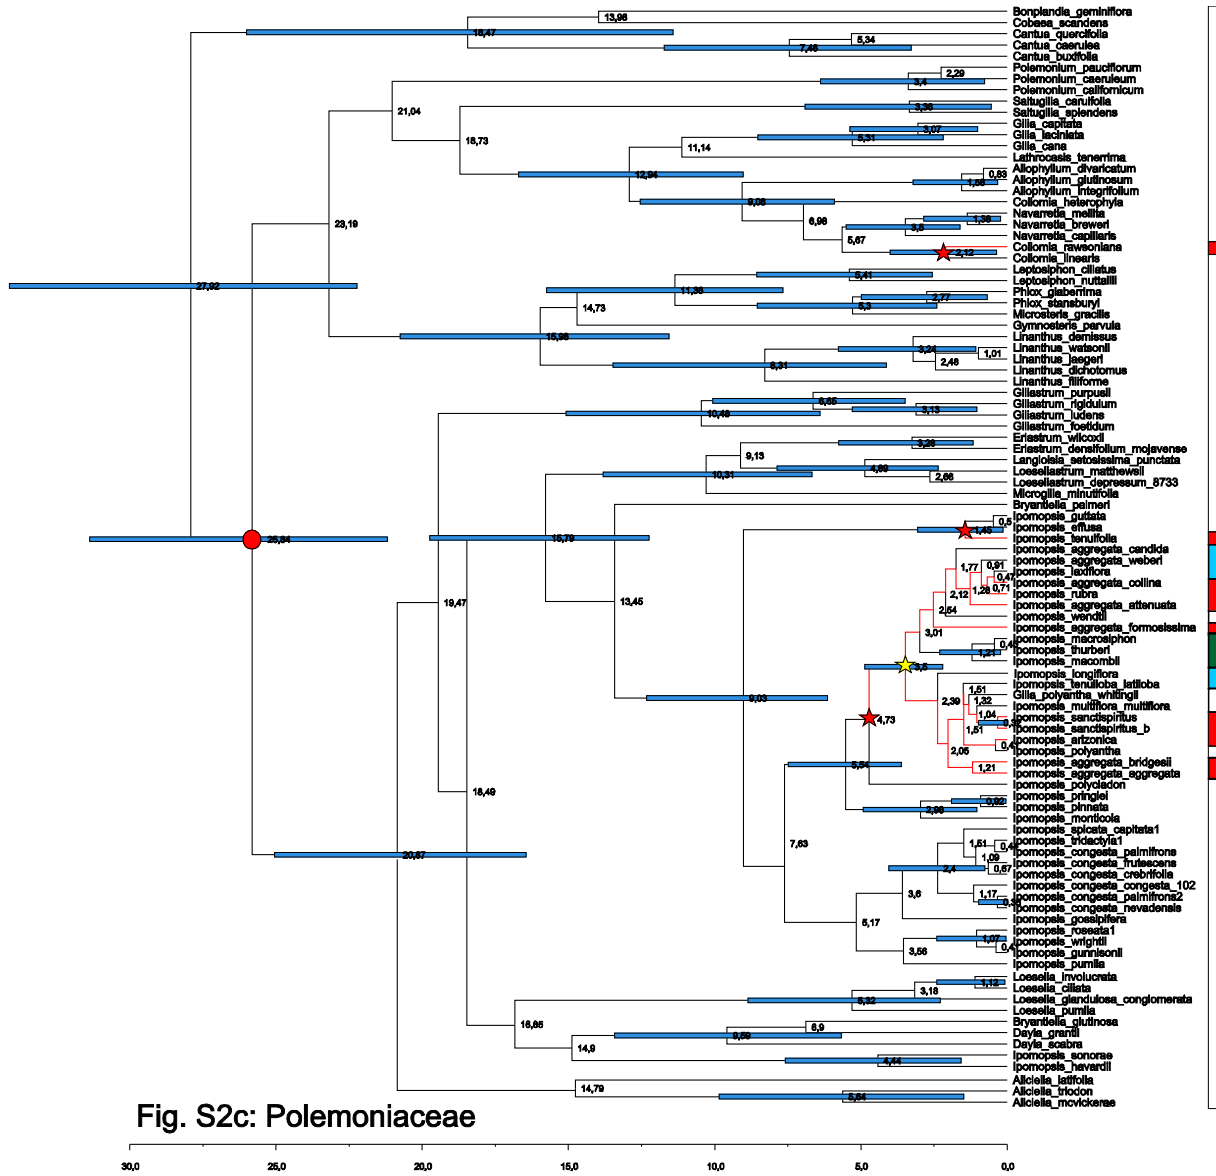

Fig. S2c: Polemoniaceae

Fig. S2d: *Keckia* (Plantaginaceae)

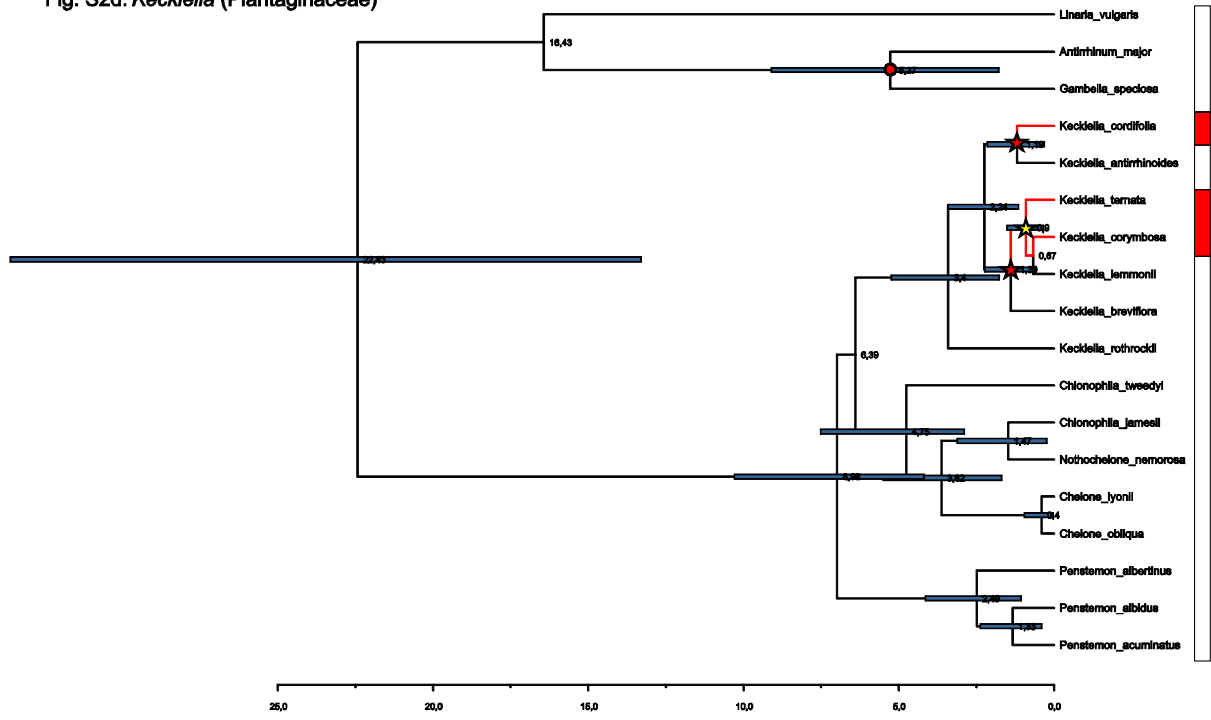

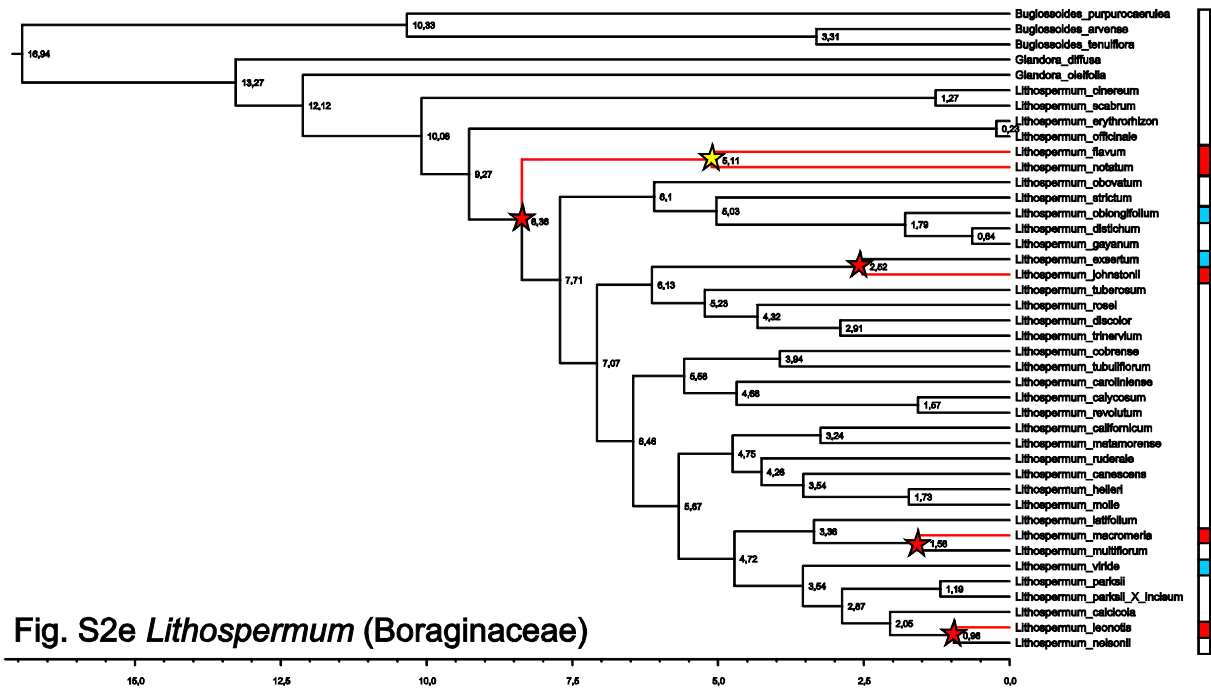

Fig. S2e *Lithospermum* (Boraginaceae)

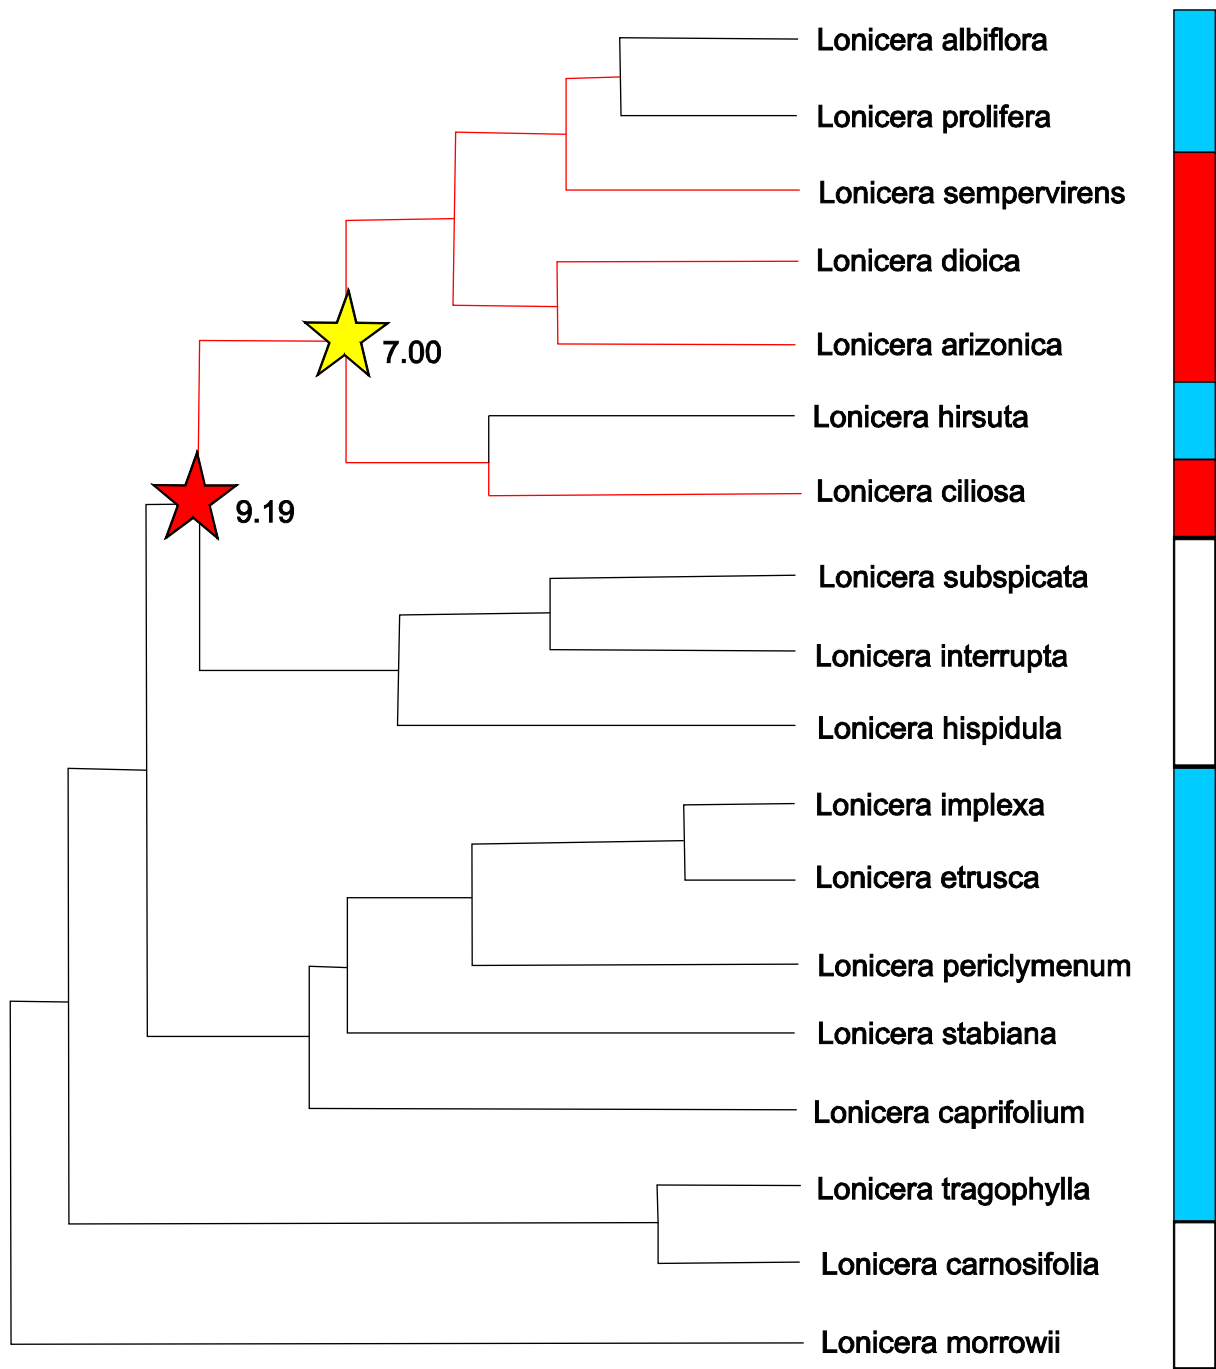

Fig. S2f *Lonicera* (Caprifoliaceae)

Fig. S2g *Monarda* (Lamiaceae)

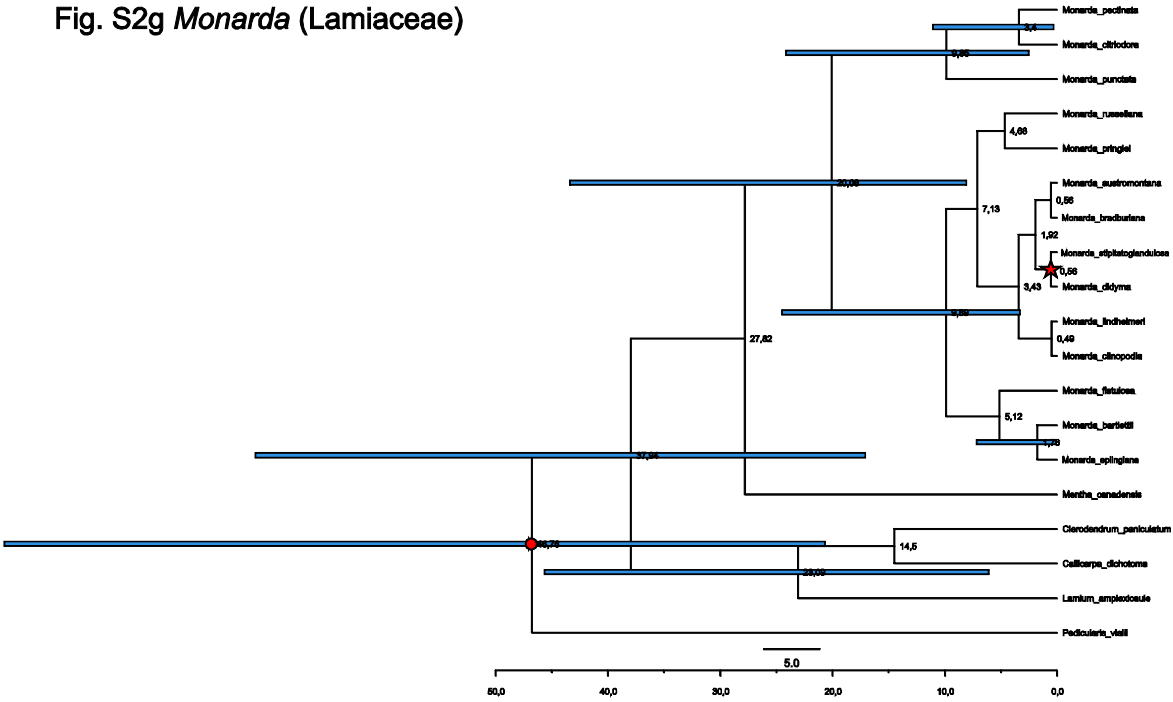

Fig. S2h: *Ribes* (Grossulariaceae)

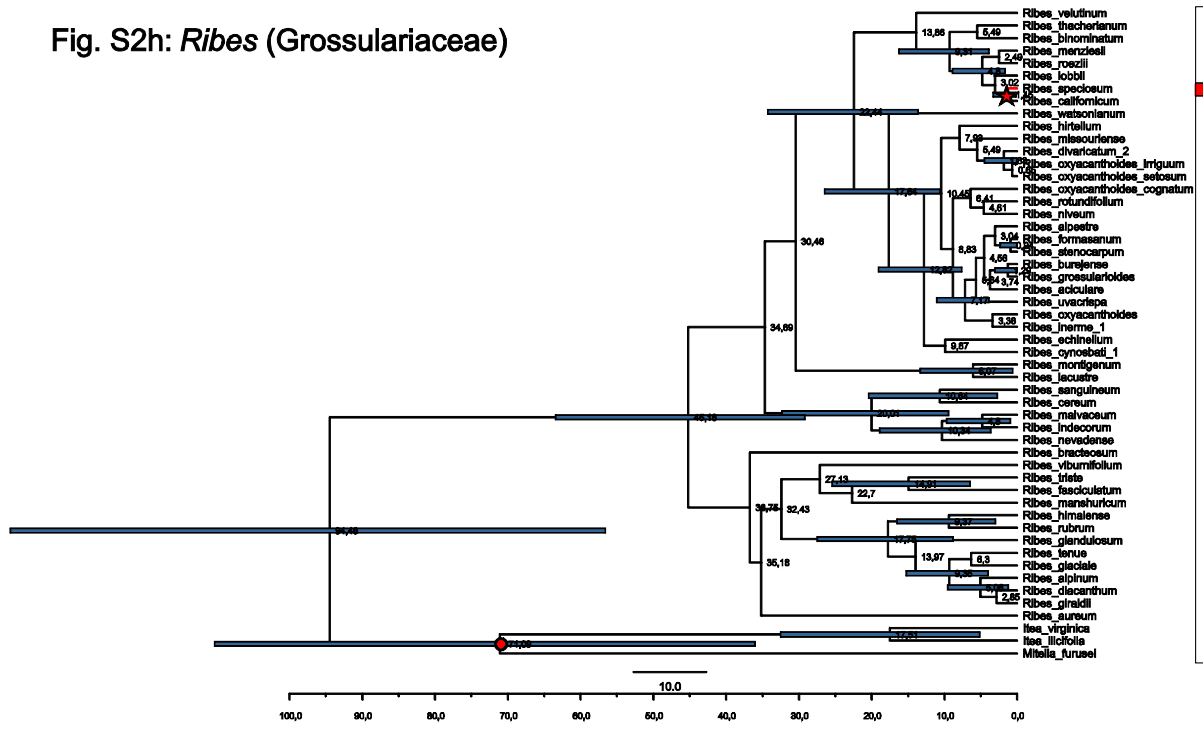

Supplement: 12862_2015_388_MOESM3_ESM.pdf [file 12862_2015_388_MOESM3_ESM.pdf]
