# Supplementary material for: The temporal build-up of hummingbird/plant mutualisms in North America and temperate South America
Source: PubMed Central journal article supplement (PMC4460853; doi:10.1186/s12862-015-0388-z), 2015-06-10

Fig. S3d: *Puya* (Bromeliaceae)

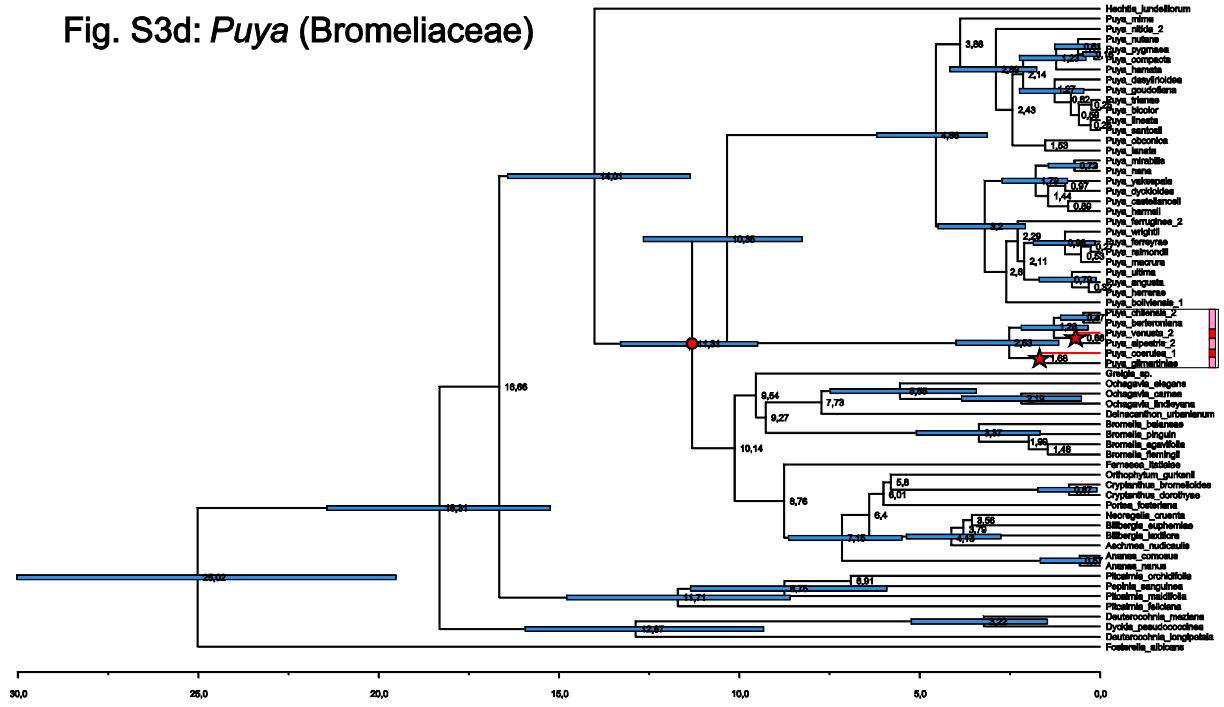



Fig. S3f: *Schizanthus* (Solanaceae)

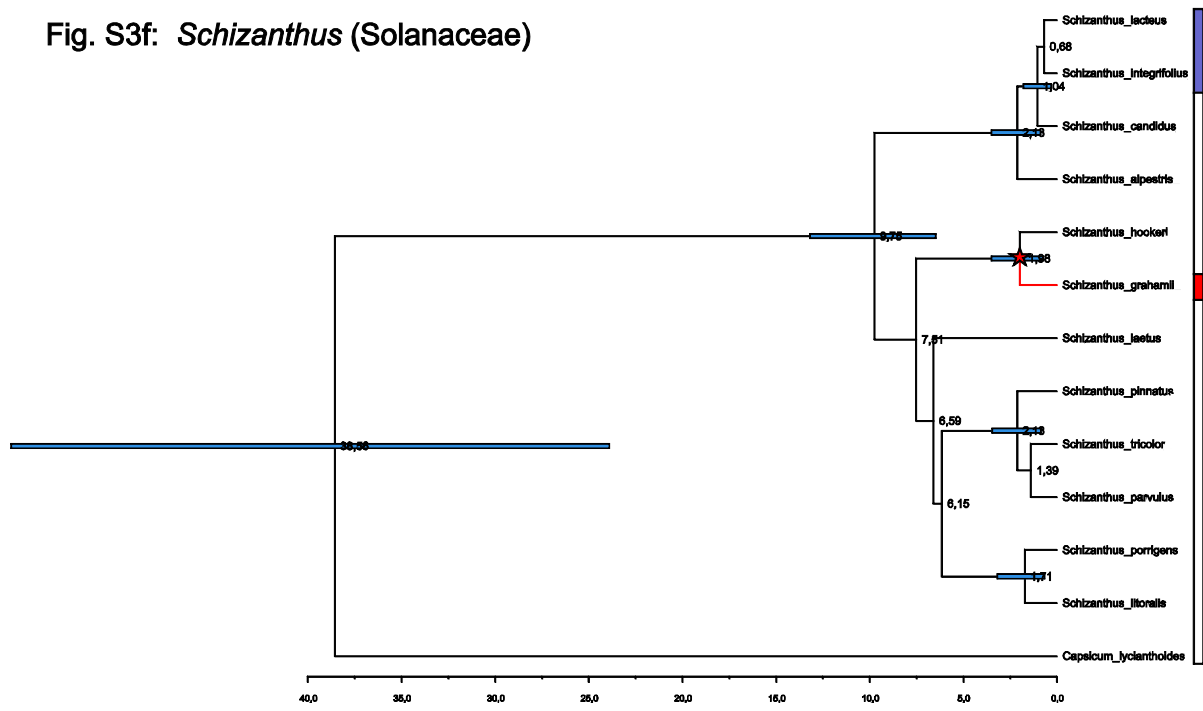

Fig. S3g: *Tristerix* (Loranthaceae)

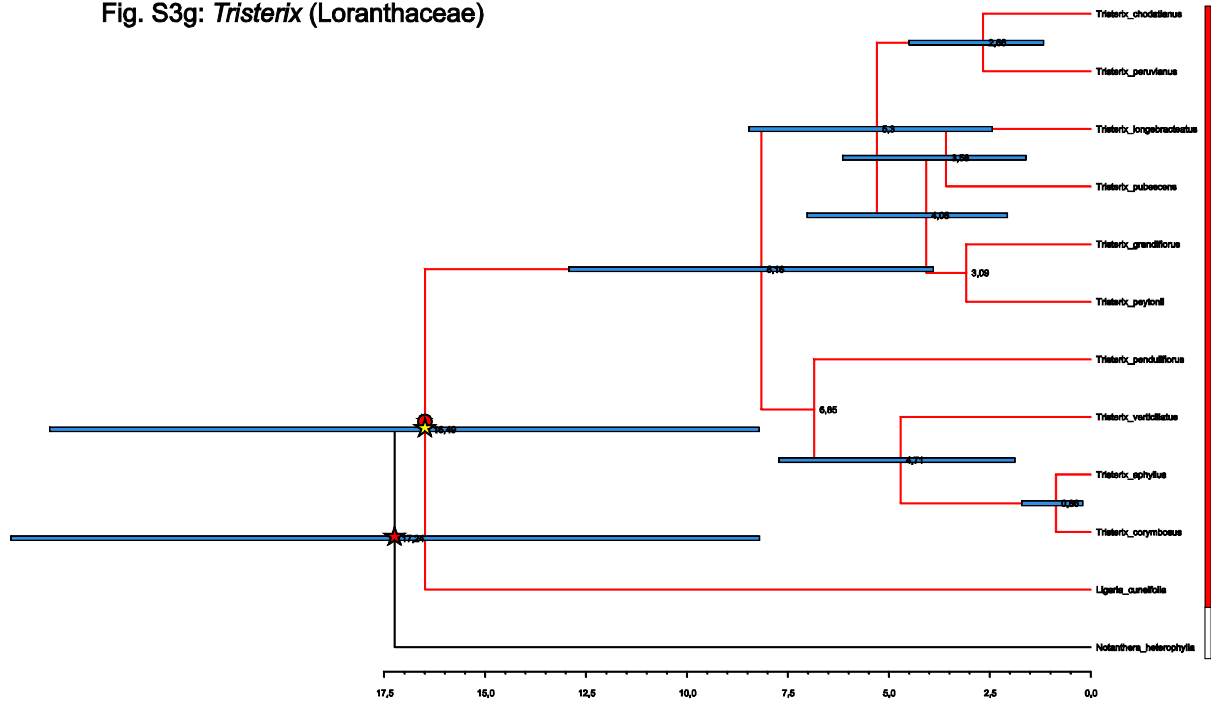

Fig. S3h *Vestia* (Solanaceae)

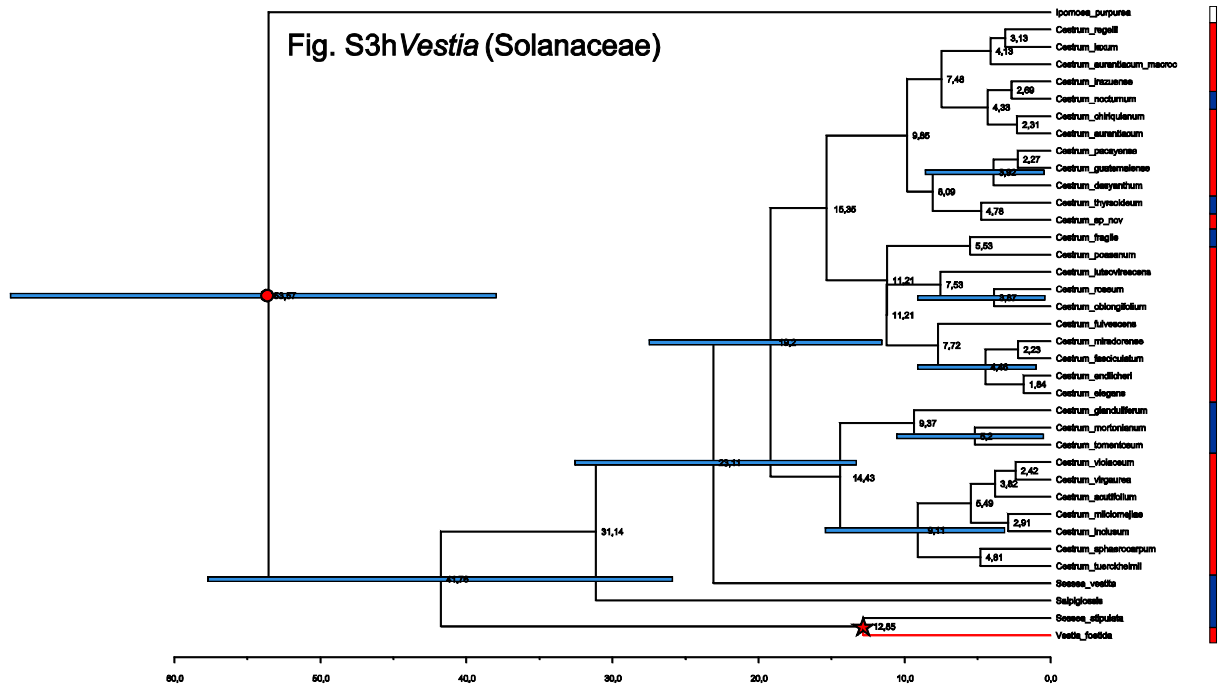

Supplement: 12862_2015_388_MOESM4_ESM.pdf [file 12862_2015_388_MOESM4_ESM.pdf]
